# Supplementary material for: Real-world treatment patterns and clinical outcomes in EGFR-mutant locally advanced lung adenocarcinoma: A multi-center cohort study
Source: PubMed Central journal article supplement — J Natl Cancer Cent. 2022 Nov 23;3(1):65–71. doi: 10.1016/j.jncc.2022.11.003 (PMC11256516; doi:10.1016/j.jncc.2022.11.003), 2022-11-23
Supplement: mmc1.pdf [file mmc1.pdf]

## Supplementary materials

### Real-world treatment patterns and clinical outcomes in *EGFR*-mutant locally advanced lung adenocarcinoma: a multi-center cohort study

Nan Bi, Kunpeng Xu, Hong Ge, Ming Chen, Mingyan E, Li Zhang, Jianzhong Cao, Xu Zhang, Xiao Ding, Bing Xia, Lujun Zhao, Lijie Han, Jiancheng Li, Chen Hu, Luhua Wang

#### Supplementary Table 1

The distribution of patients in the hospitals participating in this study.

| Hospital | N   | CRT | TKI+RT | TKI |
|----------|-----|-----|--------|-----|
| 1        | 129 | 46  | 35     | 48  |
| 2        | 89  | 14  | 7      | 68  |
| 3        | 49  | 26  | 12     | 11  |
| 4        | 34  | 2   | 9      | 23  |
| 5        | 32  | 3   | 29     | 0   |
| 6        | 31  | 8   | 1      | 22  |
| 7        | 26  | 0   | 0      | 26  |
| 8        | 22  | 0   | 2      | 20  |
| 9        | 14  | 1   | 5      | 8   |
| 10       | 9   | 3   | 5      | 1   |
| 11       | 4   | 0   | 0      | 4   |
| 12       | 1   | 1   | 0      | 0   |
| Overall  | 440 | 104 | 105    | 231 |

Abbreviations: CRT, chemoradiation therapy; RT, radiation therapy; TKI, tyrosine kinase inhibitor.

## Supplementary Table 2

Baseline variables for different groups with standardized differences before inverse-probability of treatment weighting analysis.

|                      | Unweighted          |          |                  |          |                     |          |
|----------------------|---------------------|----------|------------------|----------|---------------------|----------|
|                      | EGFR-TKI+RT vs. CRT |          | EGFR-TKI vs. CRT |          | EGFR-TKI+RT vs. TKI |          |
|                      | SMD                 | <i>P</i> | SMD              | <i>P</i> | SMD                 | <i>P</i> |
| <b>Age</b>           |                     |          |                  |          |                     |          |
| ≥ 60                 | 0.387               | 0.0011   | 0.302            | 0.011    | 0.085               | 0.537    |
| < 60                 | 0.387               | 0.0011   | 0.302            | 0.011    | 0.085               | 0.537    |
| <b>Sex</b>           |                     |          |                  |          |                     |          |
| Female               | 0.113               | 0.339    | 0.260            | 0.030    | 0.147               | 0.302    |
| Male                 | 0.113               | 0.339    | 0.260            | 0.030    | 0.147               | 0.302    |
| <b>Smoking</b>       |                     |          |                  |          |                     |          |
| Yes                  | 0.126               | 0.287    | 0.137            | 0.264    | 0.263               | 0.065    |
| No                   | 0.126               | 0.287    | 0.137            | 0.264    | 0.263               | 0.065    |
| <b>ECOG PS</b>       |                     |          |                  |          |                     |          |
| < 2                  | 0.223               | 0.059    | 0.094            | 0.460    | 0.129               | 0.246    |
| ≥ 2                  | 0.223               | 0.059    | 0.094            | 0.460    | 0.129               | 0.246    |
| <b>Stage</b>         |                     |          |                  |          |                     |          |
| III A                | 0.142               | 0.231    | 0.129            | 0.265    | 0.270               | 0.050    |
| III B                | 0.142               | 0.231    | 0.129            | 0.265    | 0.270               | 0.050    |
| <b>PET-CT</b>        |                     |          |                  |          |                     |          |
| Yes                  | 0.331               | 0.005    | 0.339            | 0.005    | 0.008               | 0.958    |
| No                   | 0.331               | 0.005    | 0.339            | 0.005    | 0.008               | 0.958    |
| <b>EGFR mutation</b> |                     |          |                  |          |                     |          |
| 19DEL                | 0.049               | 0.733    | 0.058            | 0.236    | 0.010               | 0.735    |
| L858R                | 0.082               | 0.733    | 0.152            | 0.236    | 0.070               | 0.735    |
| Uncommon             | 0.063               | 0.733    | 0.176            | 0.236    | 0.113               | 0.735    |

Abbreviations: 19DEL, exon 19 deletion; CRT, chemoradiation therapy; ECOG PS, Eastern Cooperative Oncology Group performance status; EGFR, epidermal growth factor receptor; PET-CT, positron emission tomography-computed tomography; RT, radiation therapy; SMD, standardized mean difference; TKI, tyrosine kinase inhibitor.

**Supplementary Table 3**

Baseline variables for different groups with standardized difference after inverse-probability of treatment weighting analysis.

|                      | <b>Unweighted</b>          |          |                    |          |                            |          |
|----------------------|----------------------------|----------|--------------------|----------|----------------------------|----------|
|                      | <b>EGFR-TKI+RT vs. CRT</b> |          | <b>TKI vs. CRT</b> |          | <b>EGFR-TKI+RT vs. TKI</b> |          |
|                      | <b>SMD</b>                 | <b>P</b> | <b>SMD</b>         | <b>P</b> | <b>SMD</b>                 | <b>P</b> |
| <b>Age</b>           |                            |          |                    |          |                            |          |
| ≥ 60                 | 0.017                      | 0.914    | 0.618              | 0.618    | 0.048                      | 0.711    |
| < 60                 | 0.017                      | 0.914    | 0.618              | 0.618    | 0.048                      | 0.711    |
| <b>Sex</b>           |                            |          |                    |          |                            |          |
| Female               | 0.008                      | 0.960    | 0.999              | 0.999    | 0.007                      | 0.955    |
| Male                 | 0.008                      | 0.960    | 0.999              | 0.999    | 0.007                      | 0.955    |
| <b>Smoking</b>       |                            |          |                    |          |                            |          |
| Yes                  | 0.063                      | 0.682    | 0.959              | 0.959    | 0.069                      | 0.611    |
| No                   | 0.063                      | 0.682    | 0.959              | 0.959    | 0.069                      | 0.611    |
| <b>ECOG PS</b>       |                            |          |                    |          |                            |          |
| < 2                  | 0.078                      | 0.600    | 0.953              | 0.953    | 0.085                      | 0.533    |
| ≥ 2                  | 0.078                      | 0.600    | 0.953              | 0.953    | 0.085                      | 0.533    |
| <b>Stage</b>         |                            |          |                    |          |                            |          |
| III A                | 0.026                      | 0.866    | 0.754              | 0.754    | 0.016                      | 0.896    |
| III B                | 0.026                      | 0.866    | 0.754              | 0.754    | 0.016                      | 0.896    |
| <b>PET-CT</b>        |                            |          |                    |          |                            |          |
| Yes                  | 0.015                      | 0.922    | 0.818              | 0.818    | 0.016                      | 0.902    |
| No                   | 0.015                      | 0.922    | 0.818              | 0.818    | 0.016                      | 0.902    |
| <b>EGFR mutation</b> |                            |          |                    |          |                            |          |
| 19DEL                | 0.001                      | 0.861    | 0.829              | 0.829    | 0.013                      | 0.994    |
| L858R                | 0.042                      | 0.861    | 0.829              | 0.829    | 0.013                      | 0.994    |
| Uncommon             | 0.081                      | 0.861    | 0.829              | 0.829    | 0.000*                     | 0.994    |

Abbreviations: 19DEL, exon 19 deletion; CRT, chemoradiation therapy; ECOG PS, Eastern Cooperative Oncology Group performance status; EGFR, epidermal growth factor receptor; PET-CT, positron emission tomography-computed tomography; RT, radiation therapy; SMD, standardized mean difference; TKI, tyrosine kinase inhibitor.

**Supplementary Table 4**

The univariate and multivariable analysis of PFS.

|                      | Univariate analysis |           |         | Multivariable analysis |           |          |
|----------------------|---------------------|-----------|---------|------------------------|-----------|----------|
|                      | HR                  | 95% CI    | P       | HR                     | 95% CI    | P        |
| <b>Age</b>           |                     |           | 0.253   |                        |           |          |
| ≥ 60 vs. < 60        | 1.13                | 0.92-1.40 |         |                        |           |          |
| <b>Sex</b>           |                     |           | 0.873   |                        |           |          |
| Female vs. male      | 1.02                | 0.82-1.26 |         |                        |           |          |
| <b>Smoking</b>       |                     |           | 0.062   |                        |           | 0.384    |
| Yes vs. No           | 1.24                | 0.99-1.56 |         | 1.11                   | 0.88-1.40 |          |
| <b>ECOG PS</b>       |                     |           | 0.282   |                        |           |          |
| ≥ 2 vs. < 2          | 0.78                | 0.49-1.23 |         |                        |           |          |
| <b>Stage</b>         |                     |           | < 0.001 |                        |           | < 0.0001 |
| IIIA vs. IIIB        | 0.60                | 0.47-0.76 |         | 0.59                   | 0.47-0.75 |          |
| <b>PET-CT</b>        |                     |           | 0.131   |                        |           |          |
| Yes vs. No           | 1.17                | 0.93-1.46 |         |                        |           |          |
| <b>EGFR mutation</b> |                     |           | 0.018   |                        |           | 0.022    |
| L858R vs. 19DEL      | 0.99                | 0.79-1.23 | 0.882   | 0.96                   | 0.77-1.20 | 0.729    |
| <b>Treatment</b>     |                     |           | < 0.001 |                        |           | < 0.001  |
| EGFR-TKI vs. CRT     | 0.69                | 0.54-0.89 | 0.005   | 0.75                   | 0.58-0.97 | 0.030    |
| EGFR-TKI+RT vs. CRT  | 0.43                | 0.32-0.59 | < 0.001 | 0.46                   | 0.34-0.63 | < 0.001  |

Abbreviations: 19DEL, exon 19 deletion; CI, confidence interval; CRT, chemoradiation therapy; ECOG PS, Eastern Cooperative Oncology Group performance status; EGFR, epidermal growth factor receptor; HR, hazard ratio; PET-CT, positron emission tomography-computed tomography; PFS, progression-free survival; RT, radiation therapy; TKI, tyrosine kinase inhibitor.

**Supplementary Table 5**

The univariate and multivariable analysis of OS.

|                      | Univariate analysis |           |       | Multivariable analysis |             |       |
|----------------------|---------------------|-----------|-------|------------------------|-------------|-------|
|                      | HR                  | 95% CI    | P     | HR                     | 95% CI      | P     |
| <b>Age</b>           |                     |           | 0.071 |                        |             | 0.108 |
| ≥ 60 vs. < 60        | 1.33                | 0.98-1.81 |       | 1.30                   | 0.944-1.784 |       |
| <b>Sex</b>           |                     |           | 0.123 |                        |             |       |
| Female vs. male      | 1.29                | 0.93-1.77 |       |                        |             |       |
| <b>Smoking</b>       |                     |           | 0.431 |                        |             |       |
| Yes vs. No           | 1.15                | 0.82-1.60 |       |                        |             |       |
| <b>ECOG PS</b>       |                     |           | 0.405 |                        |             |       |
| ≥ 2 vs. < 2          | 0.76                | 0.40-1.45 |       |                        |             |       |
| <b>Stage</b>         |                     |           | 0.033 |                        |             | 0.024 |
| IIIA vs. IIIB        | 0.69                | 0.49-0.97 |       | 0.67                   | 0.48-0.95   |       |
| <b>PET-CT</b>        |                     |           | 0.018 |                        |             | 0.014 |
| Yes vs. No           | 0.63                | 0.44-0.89 |       | 0.64                   | 0.44-0.91   |       |
| <b>EGFR mutation</b> |                     |           | 0.046 |                        |             | 0.050 |
| L858R vs. 19DEL      | 1.40                | 1.01-1.94 | 0.042 | 1.29                   | 0.93-1.80   | 0.176 |
| <b>Treatment</b>     |                     |           | 0.037 |                        |             | 0.075 |
| EGFR-TKI vs. CRT     | 1.04                | 0.73-1.48 | 0.875 | 1.04                   | 0.73-1.48   | 0.828 |
| EGFR-TKI+RT vs. CRT  | 0.62                | 0.40-0.96 | 0.035 | 0.65                   | 0.41-1.02   | 0.059 |

Abbreviations: 19DEL, exon 19 deletion; CI, confidence interval; CRT, chemoradiation therapy; ECOG PS, Eastern Cooperative Oncology Group performance status; EGFR, epidermal growth factor receptor; HR, hazard ratio; OS, overall survival; PET-CT, positron emission tomography-computed tomography; RT, radiation therapy; TKI, tyrosine kinase inhibitor.

**Supplementary Table 6**

The univariate and multivariate analysis of competing risk factors of locoregional recurrence.

|                      | Univariate analysis |             |          | Multivariable analysis |             |          |
|----------------------|---------------------|-------------|----------|------------------------|-------------|----------|
|                      | SHR                 | 95% CI      | <i>P</i> | SHR                    | 95% CI      | <i>P</i> |
| <b>Age</b>           |                     |             | 0.364    |                        |             |          |
| ≥ 60 vs. < 60        | 0.88                | 0.676-1.155 |          |                        |             |          |
| <b>Sex</b>           |                     |             | 0.727    |                        |             |          |
| Female vs. male      | 0.95                | 0.727-1.249 |          |                        |             |          |
| <b>Smoking</b>       |                     |             | 0.220    |                        |             |          |
| Yes vs. No           | 1.20                | 0.897-1.564 |          |                        |             |          |
| <b>ECOG PS</b>       |                     |             | 0.664    |                        |             |          |
| ≥ 2 vs. < 2          | 1.14                | 0.622-2.108 |          |                        |             |          |
| <b>Stage</b>         |                     |             | 0.001    |                        |             | 0.001    |
| IIIA vs. IIIB        | 1.68                | 1.243-2.264 |          | 1.69                   | 1.245-2.288 |          |
| <b>PET-CT</b>        |                     |             | 0.293    |                        |             |          |
| Yes vs. No           | 1.05                | 0.876-1.553 |          |                        |             |          |
| <b>EGFR mutation</b> |                     |             |          |                        |             |          |
| L858R vs. 19DEL      | 0.84                | 0.631-1.117 | 0.231    | 0.80                   | 0.596-1.065 | 0.124    |
| <b>Treatment</b>     |                     |             |          |                        |             |          |
| EGFR-TKI vs. CRT     | 0.46                | 0.299-0.703 | <0.001   | 0.50                   | 0.326-0.775 | 0.002    |
| EGFR-TKI+RT vs. CRT  | 1.26                | 0.917-1.730 | 0.155    | 1.45                   | 1.034-2.034 | 0.031    |

Abbreviations: 19DEL, exon 19 deletion; CI, confidence interval; ECOG PS, Eastern Cooperative Oncology Group performance status; EGFR, epidermal growth factor receptor; PET-CT, positron emission tomography-computed tomography; SHR, sub-distribution hazard regression.

**Supplementary Table 7**

The univariate and multivariable competing risks analysis of distant metastases.

|                      | Univariate analysis |             |          | Multivariable analysis |             |          |
|----------------------|---------------------|-------------|----------|------------------------|-------------|----------|
|                      | SHR                 | 95% CI      | <i>P</i> | SHR                    | 95% CI      | <i>P</i> |
| <b>Age</b>           |                     |             | 0.009    |                        |             | 0.032    |
| ≥ 60 vs. < 60        | 0.71                | 0.550-0.919 |          | 0.75                   | 0.574-0.975 |          |
| <b>Sex</b>           |                     |             | 0.684    |                        |             |          |
| Female vs. male      | 0.95                | 0.734-1.225 |          |                        |             |          |
| <b>Smoking</b>       |                     |             | 0.668    |                        |             |          |
| Yes vs. No           | 1.06                | 0.805-1.403 |          |                        |             |          |
| <b>ECOG PS</b>       |                     |             | 0.269    |                        |             |          |
| ≥ 2 vs. < 2          | 0.69                | 0.363-1.326 |          |                        |             |          |
| <b>Stage</b>         |                     |             | 0.083    |                        |             | 0.199    |
| IIIA vs. IIIB        | 1.27                | 0.969-1.675 |          | 1.20                   | 0.908-1.589 |          |
| <b>PET-CT</b>        |                     |             | 0.516    |                        |             |          |
| Yes vs. No           | 1.09                | 0.833-1.438 |          |                        |             |          |
| <b>EGFR mutation</b> |                     |             |          |                        |             |          |
| L858R vs. 19DEL      | 1.05                | 0.804-1.368 | 0.726    | 1.09                   | 0.839-1.435 | 0.615    |
| <b>Treatment</b>     |                     |             |          |                        |             |          |
| EGFR-TKI vs. CRT     | 0.62                | 0.438-0.877 | 0.007    | 0.63                   | 0.444-0.894 | 0.010    |
| EGFR-TKI+RT vs. CRT  | 0.54                | 0.389-0.739 | < 0.0001 | 0.57                   | 0.41-0.790  | 0.001    |

Abbreviations: 19DEL, exon 19 deletion; CI, confidence interval; ECOG PS, Eastern Cooperative Oncology Group performance status; EGFR, epidermal growth factor receptor; PET-CT, positron emission tomography-computed tomography; SHR, sub-distribution hazard regression.

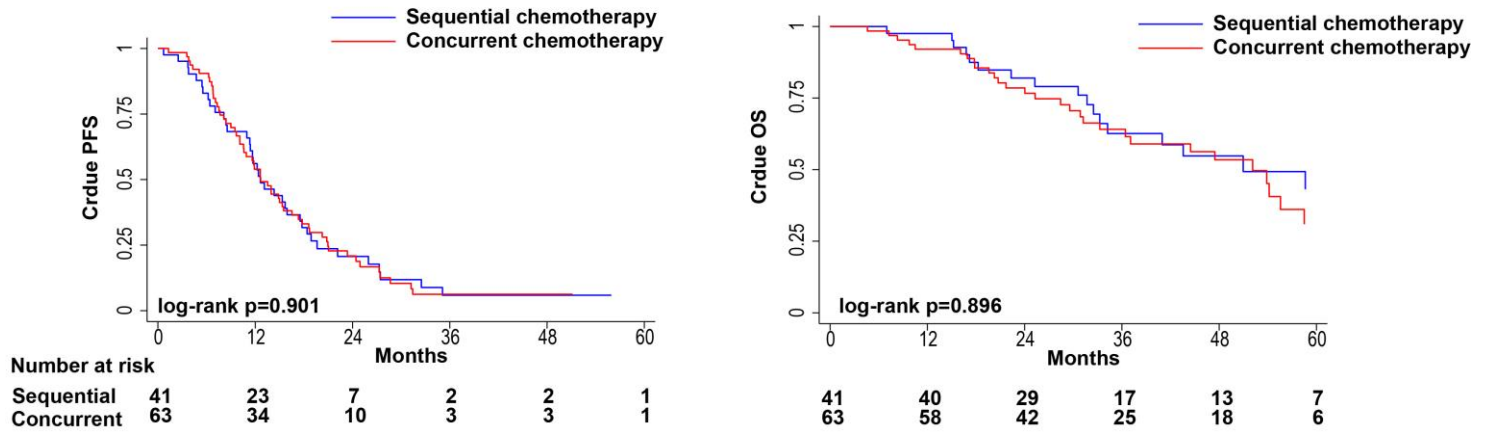

**Supplementary Fig. 1.** Progression-free survival (PFS) and overall survival (OS) evaluated using the Kaplan–Meier method in epidermal growth factor receptor mutant patients received chemoradiation therapy.



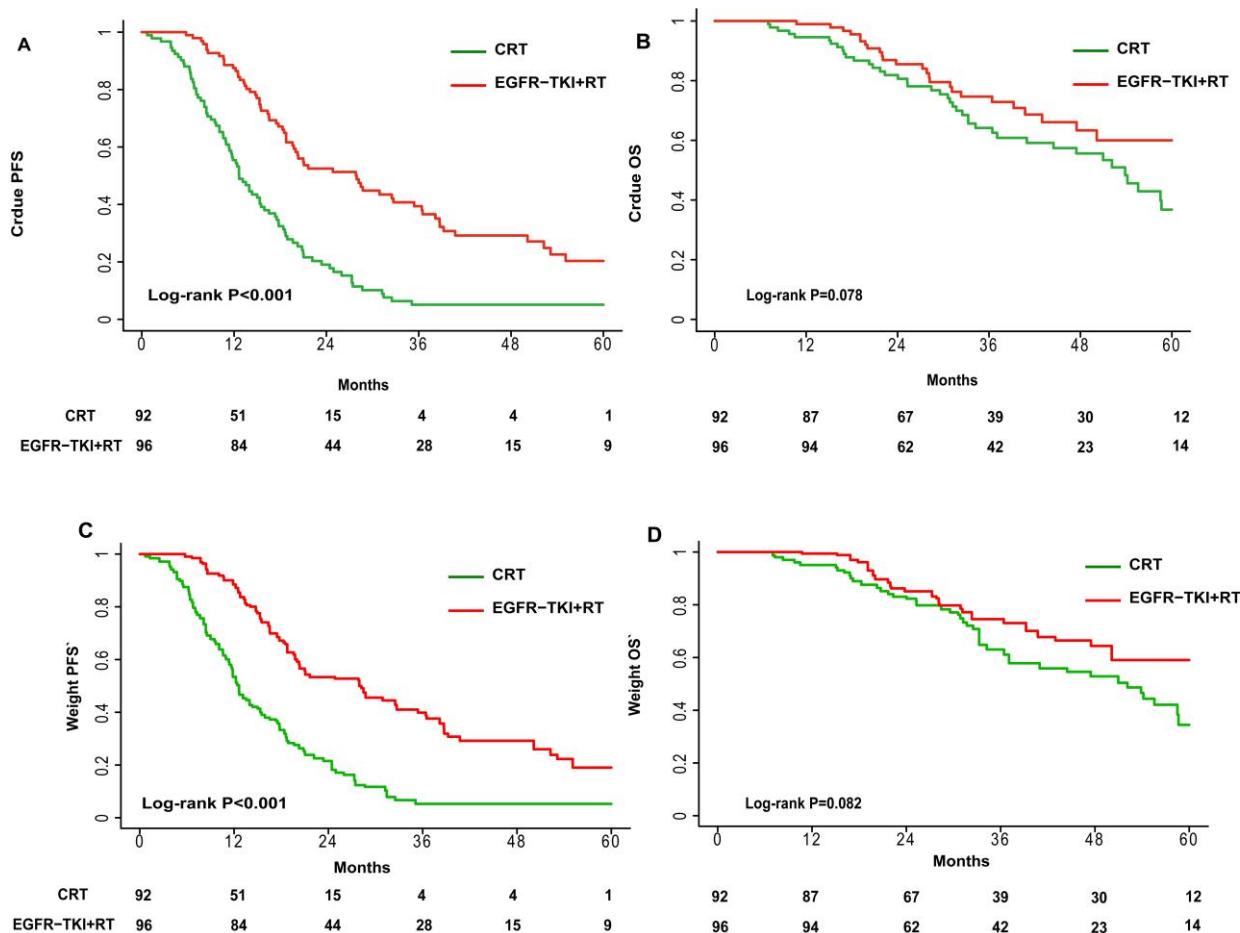

**Supplementary Fig. 2.** Progression-free survival (PFS) and overall survival (OS) evaluated using the Kaplan–Meier method before (A, B) and after (C, D) inverse-probability of treatment weighting analysis in patients with EGFR common mutation. CRT, chemoradiation therapy; EGFR, epidermal growth factor receptor; TKI, tyrosine kinase inhibitor; RT, radiation therapy.
